# Supplementary material for: A ferrocenecarboxylate-functionalized titanium-oxo-cluster: the ferrocene wheel as a sensitizer for photocurrent response
Source: Royal Society of Chemistry journal article supplement (doi:10.1039/c7dt01756a), 2017-01-01
Supplement: c7dt01756a1.pdf [file c7dt01756a1.pdf]

## Electronic Supplementary Information

### Ferrocenecarboxylate-functionalized titanium-oxo-cluster: ferrocene wheel as sensitizer for photocurrent response

Yang Fan,<sup>\*a</sup> Ying Cui,<sup>a</sup> Guo-Dong Zou,<sup>\*a</sup> Rui-Huan Duan,<sup>b</sup> Xu Zhang,<sup>b</sup> Yu-Xiang Dong,<sup>a</sup> Hai-Ting Lv,<sup>a</sup> Jun-Tao Cao<sup>\*a</sup> and Qiang-Shan Jing<sup>a</sup>

<sup>a</sup>Henan Province Key Laboratory of Utilization of Non-metallic Mineral in the South of Henan, College of Chemistry and Chemical Engineering, Xinyang Normal University, Xinyang 464000, China.

<sup>b</sup>Fujian Institute of Research on the Structure of Matter, Chinese Academy of Sciences, Fuzhou 350002, China.

### Contents

**Table S1** Crystal data and structure refinements summary for **C1**, **C2** and **C3**.

**Figure S1** (a) Coordination mode of {Ti<sub>6</sub>} in **C2**. (b) Coordination mode of {Ti<sub>6</sub>} in **C3**.

**Figure S2** XRD patterns of (a) **C1**, (b) **C2** and (c) **C3**.

**Figure S3** FT-IR spectra of **C1**, **C2** and **C3**.

**Figure S4** The TGA curves of **C1**, **C2** and **C3**.

**Figure S5** XPS spectra of (a) Ti 2p peaks and (b) O 1s peaks for **C2**.

**Figure S6** XPS spectra of (a) Ti 2p peaks and (b) O 1s peaks for **C3**.

**Figure S7** UV-vis spectra of  $1 \times 10^{-4}$  M solution of **C1** in dichloromethane.

**Figure S8** CV curves of ferrocenecarboxylic acid in dichloromethane solution containing 0.1 M n-Bu<sub>4</sub>NPF<sub>6</sub> as the supporting electrolyte, scan rate = 100 mV s<sup>-1</sup>.

**Figure S9** Density of states (DOS) plots for (a) **C2** and (b) **C3**.

**Figure S10** Room-temperature emission spectra of 1-naphthoic acid and 1-naphthylacetic acid in dichloromethane solutions ( $1 \times 10^{-6}$  M) with 280 nm excitation.

**Table S1.** Crystal data and structure refinements summary for **C1**, **C2** and **C3**.

|                                                                    | <b>C1</b>                                                                       | <b>C2</b>                                                       | <b>C3</b>                                                       |
|--------------------------------------------------------------------|---------------------------------------------------------------------------------|-----------------------------------------------------------------|-----------------------------------------------------------------|
| Empirical formula                                                  | C <sub>84</sub> H <sub>96</sub> O <sub>24</sub> Ti <sub>6</sub> Fe <sub>6</sub> | C <sub>84</sub> H <sub>84</sub> O <sub>24</sub> Ti <sub>6</sub> | C <sub>90</sub> H <sub>96</sub> O <sub>24</sub> Ti <sub>6</sub> |
| Formula weight                                                     | 2112.10                                                                         | 1764.91                                                         | 1849.06                                                         |
| Crystal system                                                     | monoclinic                                                                      | triclinic                                                       | triclinic                                                       |
| Space group                                                        | <i>P</i> 2 <sub>1</sub> / <i>n</i>                                              | <i>P</i> -1                                                     | <i>P</i> -1                                                     |
| <i>a</i> (Å)                                                       | 16.8249(7)                                                                      | 13.3081(10)                                                     | 13.4769(14)                                                     |
| <i>b</i> (Å)                                                       | 13.8268(4)                                                                      | 13.8105(12)                                                     | 13.9496(15)                                                     |
| <i>c</i> (Å)                                                       | 19.4260(7)                                                                      | 14.5437(11)                                                     | 14.1303(13)                                                     |
| $\alpha$ (°)                                                       | 90                                                                              | 63.018(8)                                                       | 65.816(10)                                                      |
| $\beta$ (°)                                                        | 90.638(4)                                                                       | 66.477(7)                                                       | 83.373(9)                                                       |
| $\gamma$ (°)                                                       | 90                                                                              | 62.871(8)                                                       | 62.506(11)                                                      |
| <i>V</i> (Å <sup>3</sup> )                                         | 4518.9(3)                                                                       | 2056.8(4)                                                       | 2140.7(4)                                                       |
| <i>Z</i>                                                           | 2                                                                               | 1                                                               | 1                                                               |
| $\rho_{\text{calcd}}$ (g cm <sup>-3</sup> )                        | 1.552                                                                           | 1.425                                                           | 1.434                                                           |
| $\mu$ (mm <sup>-1</sup> )                                          | 1.501                                                                           | 0.630                                                           | 0.609                                                           |
| <i>F</i> (000)                                                     | 2160                                                                            | 912                                                             | 960                                                             |
| <i>T</i> (K)                                                       | 295(2)                                                                          | 295(2)                                                          | 295(2)                                                          |
| Measured refls.                                                    | 19561                                                                           | 14685                                                           | 16003                                                           |
| Independent refls.                                                 | 8852                                                                            | 7251                                                            | 8402                                                            |
| <i>R</i> <sub>int</sub>                                            | 0.0391                                                                          | 0.0717                                                          | 0.0248                                                          |
| GOF                                                                | 1.022                                                                           | 1.036                                                           | 1.034                                                           |
| <i>R</i> <sub>1</sub> [ <i>I</i> > 2σ( <i>I</i> )] <sup>[a]</sup>  | 0.0501                                                                          | 0.0805                                                          | 0.0442                                                          |
| <i>wR</i> <sub>2</sub> [ <i>I</i> > 2σ( <i>I</i> )] <sup>[b]</sup> | 0.1070                                                                          | 0.1310                                                          | 0.1129                                                          |

$$^a R_1 = \sum \|F_o| - |F_c|\| / \sum |F_o| \quad . \quad ^b wR_2 = [\sum w(F_o^2 - F_c^2)^2 / \sum w(F_o^2)^2]^{1/2}.$$

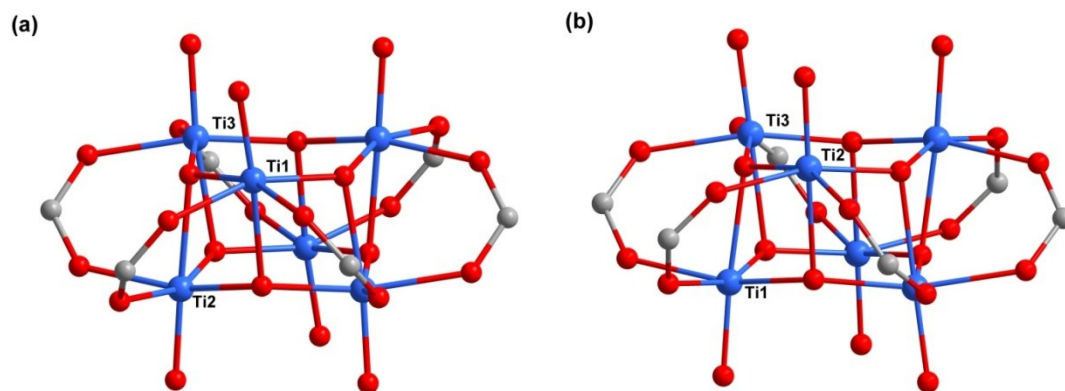

**Fig. S1** (a) Coordination mode of  $\{\text{Ti}_6\}$  in **C2**. (b) Coordination mode of  $\{\text{Ti}_6\}$  in **C3**.

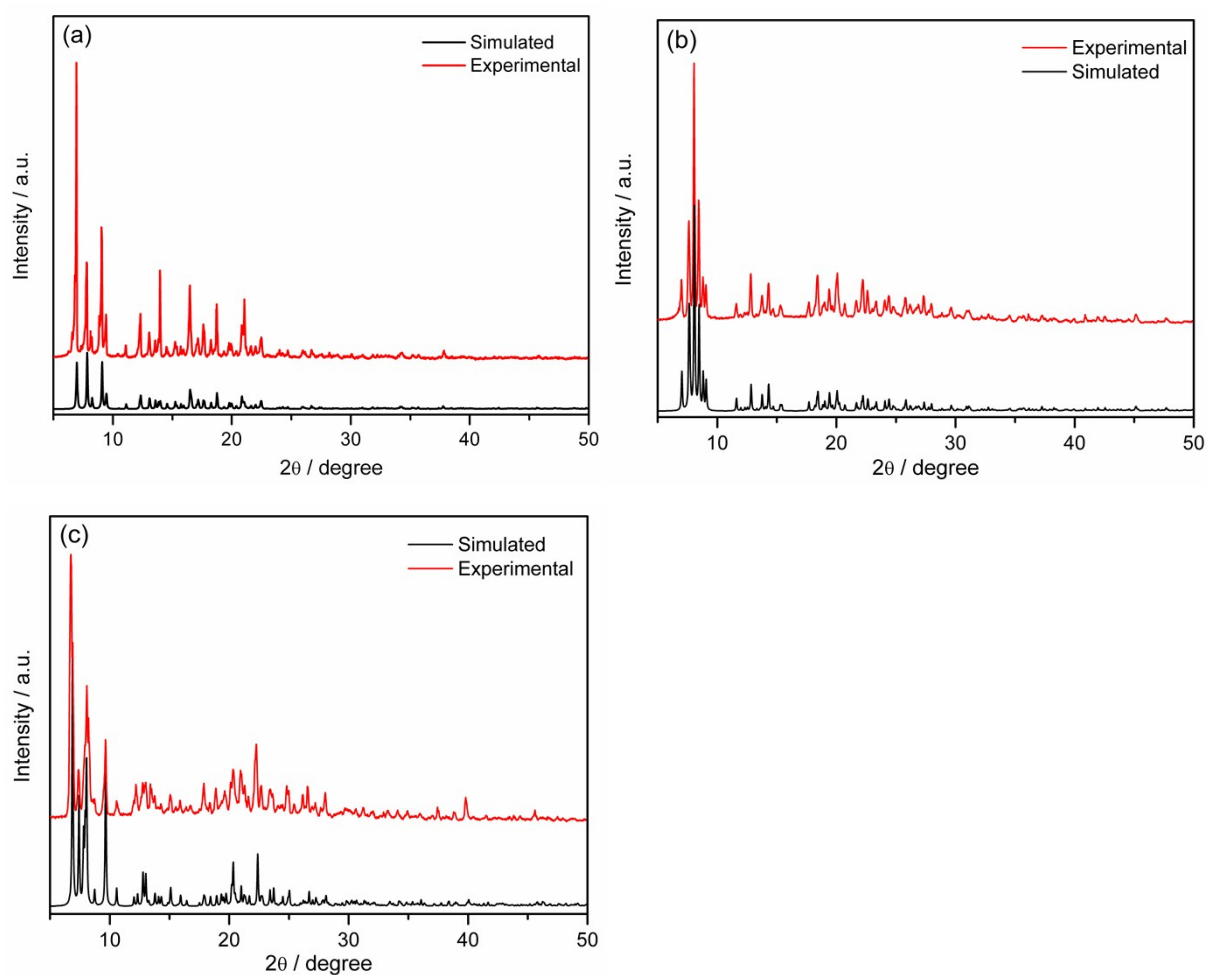

**Fig. S2** XRD patterns of (a) **C1**, (b) **C2** and (c) **C3**.

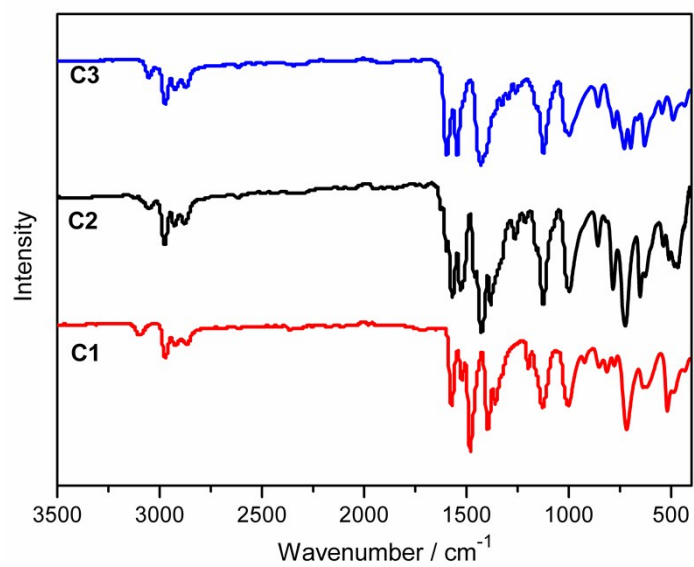

**Fig. S3** FT-IR spectra of C1, C2 and C3.

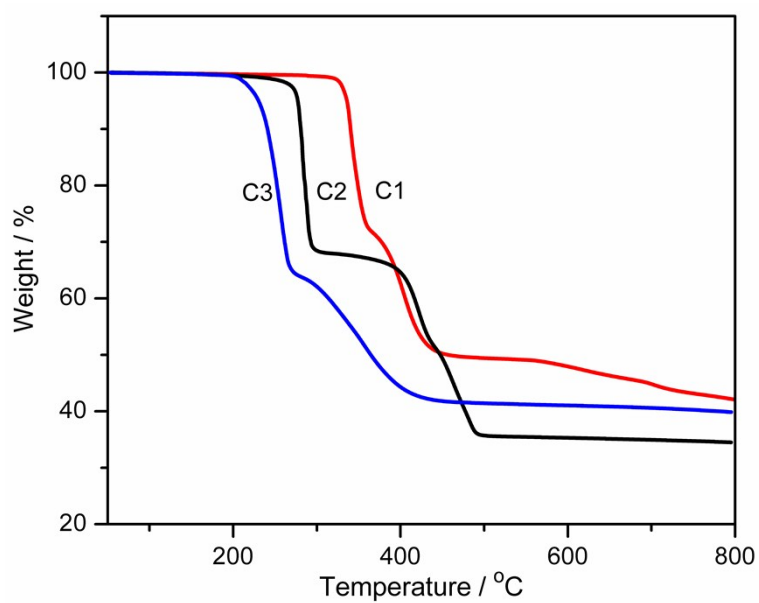

**Fig. S4** The TGA curves of C1, C2 and C3.

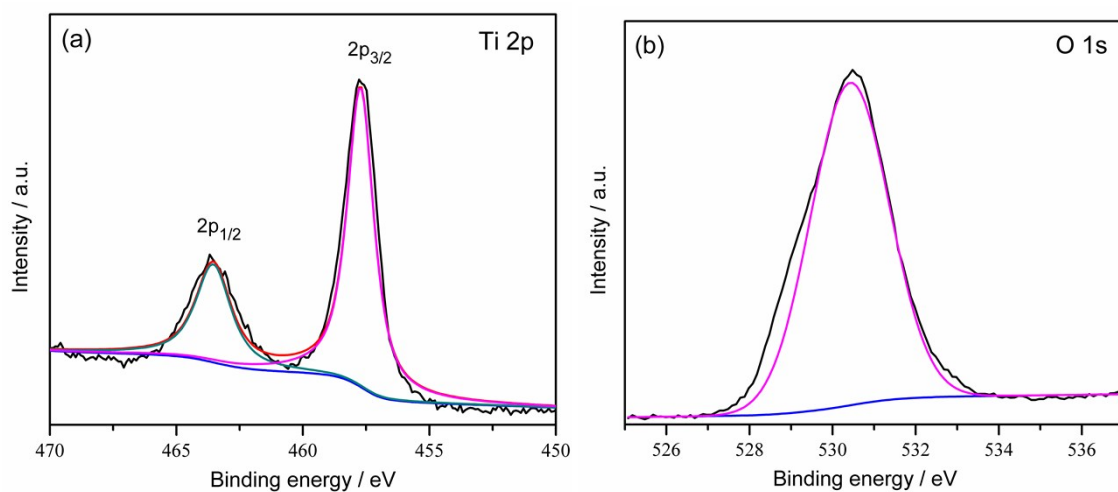

**Fig. S5** XPS spectra of (a) Ti 2p peaks and (b) O 1s peaks for **C2**.

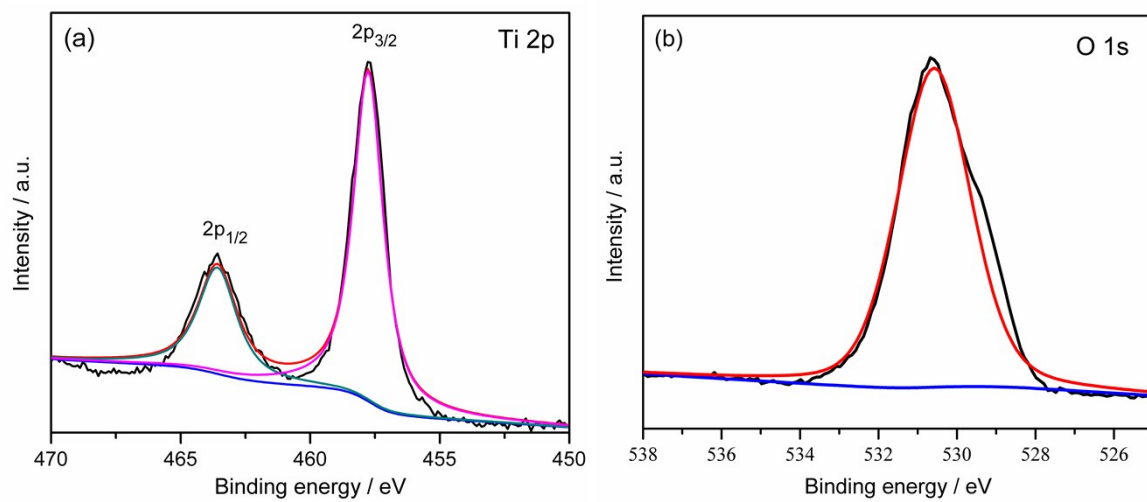

**Fig. S6** XPS spectra of (a) Ti 2p peaks and (b) O 1s peaks for **C3**.

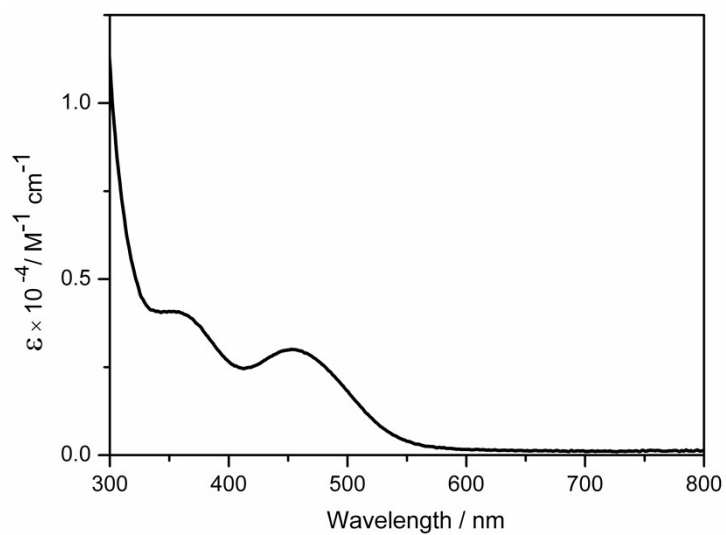

**Fig. S7** UV-vis spectra of  $1 \times 10^{-4}$  M solution of **C1** in dichloromethane.

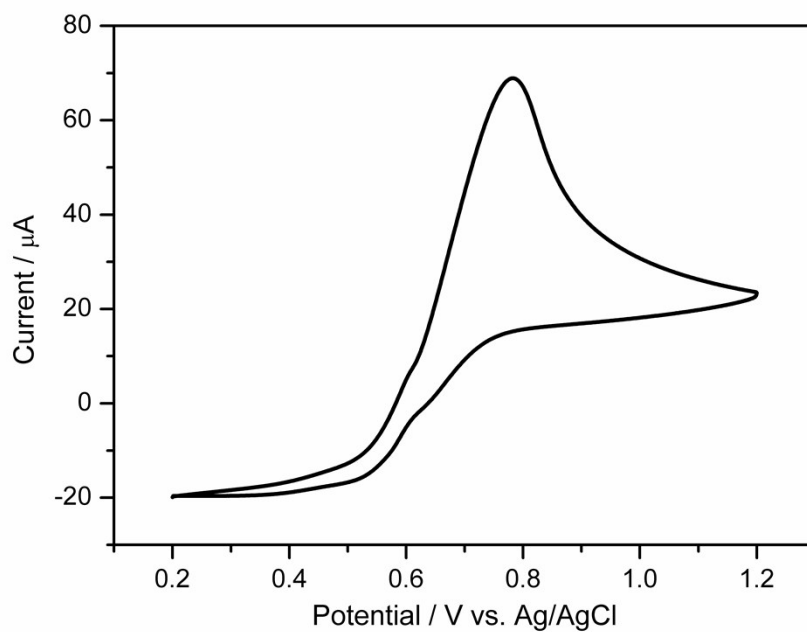

**Fig. S8** CV curves of ferrocenecarboxylic acid in dichloromethane solution containing 0.1 M  $n\text{-Bu}_4\text{NPF}_6$  as the supporting electrolyte, scan rate =  $100 \text{ mV s}^{-1}$ .

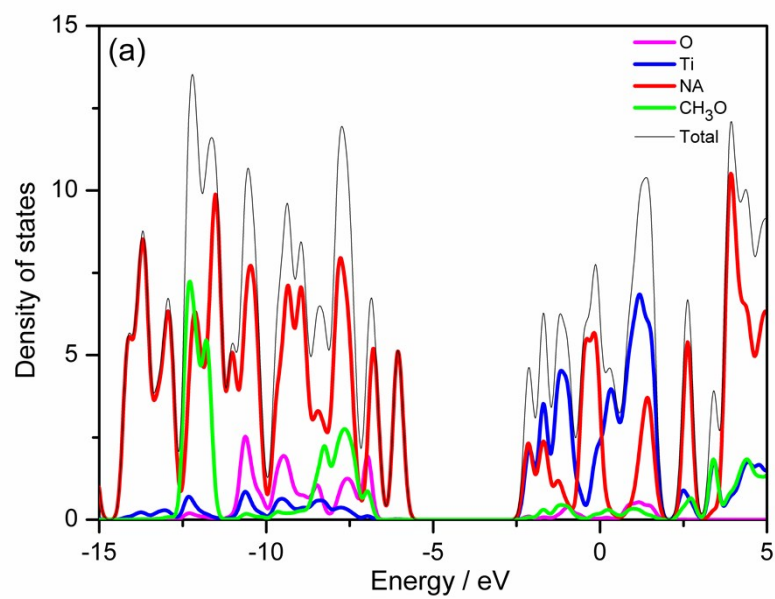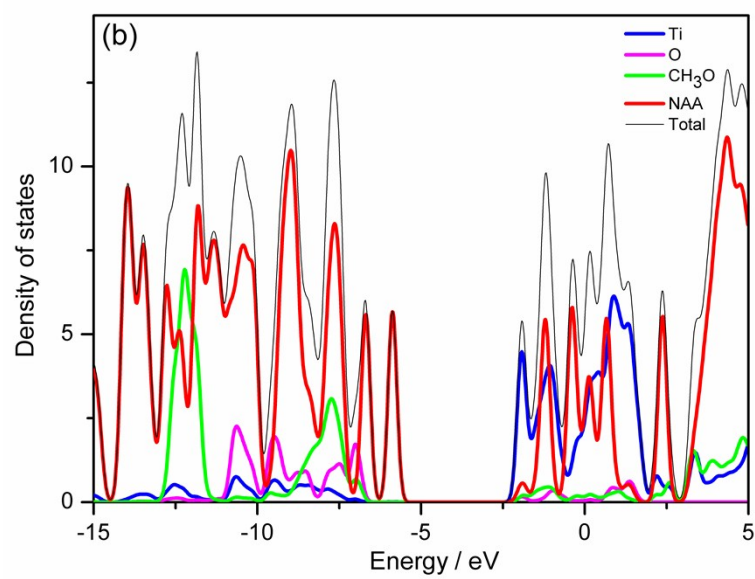

**Fig. S9** Density of states (DOS) plots for (a) C2 and (b) C3.

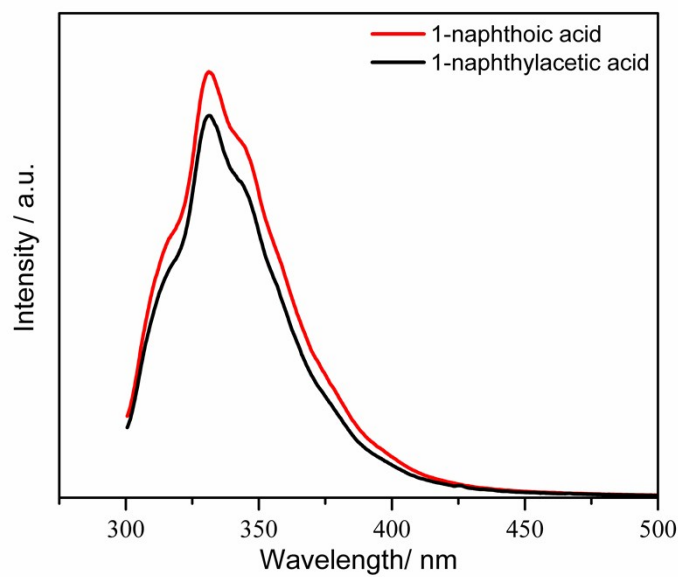

**Figure S10** Room-temperature emission spectra of 1-naphthoic acid and 1-naphthylacetic acid in dichloromethane solutions ( $1 \times 10^{-6}$  M) with 280 nm excitation.
